# Supplementary material for: Seismic noise characterization for the Buddusò–Ala dei Sardi wind park (Sardinia, Italy) and its impact on the Einstein Telescope candidate site
Source: Copernicus journal article supplement (doi:10.5194/se-16-441-2025), 2025-06-19
Supplement: Supplementary file 1 [file se-16-441-2025-supplement.pdf]

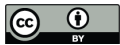

*Supplement of*

**Seismic noise characterization for the Buddusò–Ala dei Sardi wind park (Sardinia, Italy) and its impact on the Einstein Telescope candidate site**

**Giovanni Diaferia et al.**

*Correspondence to:* Giovanni Diaferia ([giovanni.diaferia@ingv.it](mailto:giovanni.diaferia@ingv.it))

The copyright of individual parts of the supplement might differ from the article licence.

# Supplementary Material

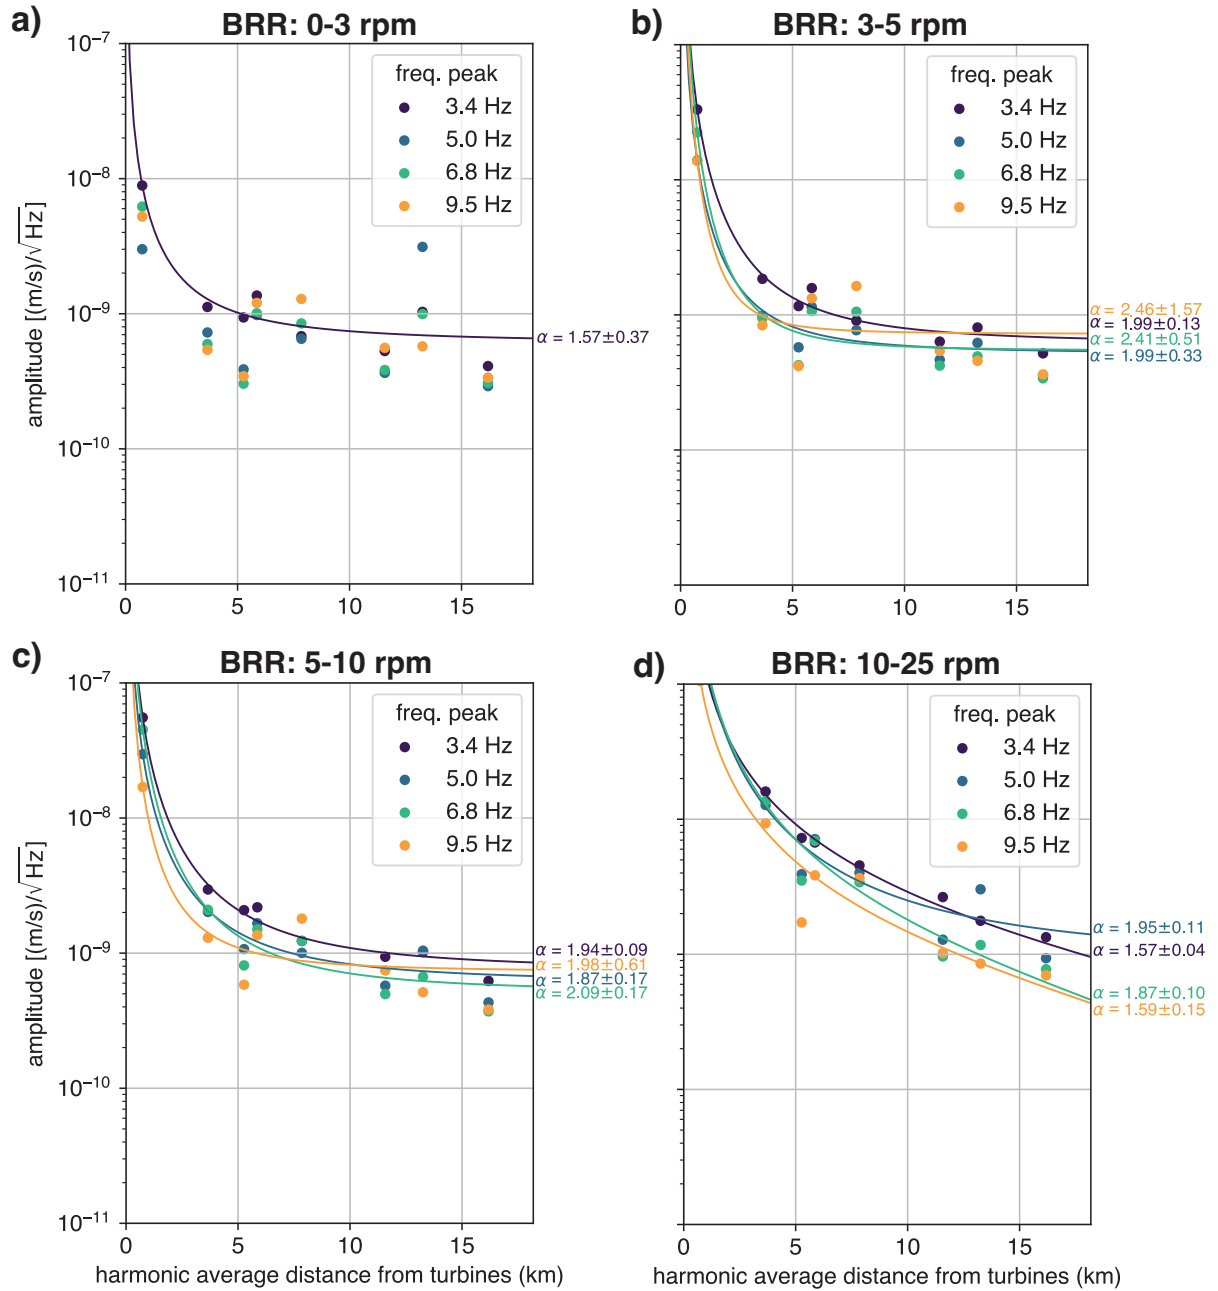

Figure S1: a)-d) Decay of spectral amplitudes of the frequency peaks at 3.4, 5.0, 6.8 and 9.5 Hz as a function of harmonic average distance from wind turbine. As opposed to figure Fig. 7a in the main manuscript, here amplitudes are not divided by  $N^{1/2}$ , where  $N$  is the total number of wind turbines within 15 km from each station.
